# Supplementary material for: Effects of a single bout of mobile action video game play on attentional networks
Source: PeerJ. 2023 Nov 10;11:e16409. doi: 10.7717/peerj.16409 (PMC10642364; doi:10.7717/peerj.16409)
Supplement: Supplemental Information 1 [file peerj-11-16409-s001.xlsx]

## Sheet:  pre-intervention(RTs and Acc )
	no cue						central cue						double cue						spatial cue
	Congruent		Incongruent		Neutral		Congruent		Incongruent		Neutral		Congruent		Incongruent		Neutral		Congruent		Incongruent		Neutral		group（1 = control group; 2 = MAVG group)	gender(1=male;2=female)
	RT(s)	accuracy	RT(s)	accuracy	RT(s)	accuracy	RT(s)	accuracy	RT(s)	accuracy	RT(s)	accuracy	RT(s)	accuracy	RT(s)	accuracy	RT(s)	accuracy	RT(s)	accuracy	RT(s)	accuracy	RT(s)	accuracy
1	0.439724	0.9375	0.513344	0.875	0.461644	0.875	0.420475	1	0.492559	1	0.444146	1	0.459799	1	0.528409	1	0.482006	1	0.419448	1	0.450263	0.9375	0.40418	1	1	1
2	0.468074	0.875	0.541148	0.8125	0.505467	1	0.464403	0.9375	0.532734	0.6875	0.454536	0.9375	0.440547	1	0.517035	0.875	0.445418	0.9375	0.37498	0.875	0.480416	0.8125	0.378307	1	1	2
3	0.503263	1	0.510887	0.9375	0.425488	0.9375	0.433621	1	0.48543	1	0.427637	1	0.422454	1	0.510285	1	0.447862	1	0.423736	0.8125	0.430027	1	0.440366	1	1	2
4	0.465934	1	0.509092	0.8125	0.455337	1	0.426503	1	0.517664	1	0.462422	1	0.439253	1	0.513868	0.9375	0.415455	1	0.435302	1	0.51733	0.9375	0.452356	0.9375	1	2
5	0.373951	1	0.453461	1	0.377736	1	0.366524	1	0.403121	0.75	0.385957	1	0.372878	0.9375	0.440193	0.875	0.386184	1	0.367481	1	0.415207	1	0.379402	1	1	2
6	0.426888	0.9375	0.505908	0.9375	0.434776	1	0.435223	1	0.491287	0.75	0.422184	1	0.432934	0.9375	0.44726	0.8125	0.424702	0.9375	0.351997	1	0.429856	0.9375	0.373359	1	1	1
7	0.407082	1	0.454524	1	0.394323	1	0.371129	1	0.44233	0.9375	0.397047	1	0.378579	1	0.439984	0.9375	0.391227	1	0.347324	0.875	0.425799	0.9375	0.361597	1	1	1
8	0.428246	0.875	0.485153	0.9375	0.452239	1	0.394821	1	0.495423	0.8125	0.422594	0.9375	0.421622	1	0.479979	0.9375	0.429038	1	0.39226	1	0.433693	1	0.386272	1	1	2
9	0.413982	0.9375	0.47754	0.875	0.432571	1	0.376712	1	0.480559	0.875	0.410973	0.875	0.397786	1	0.450134	0.75	0.370324	1	0.379477	0.9375	0.474323	0.8125	0.370337	1	1	1
10	0.434654	1	0.492757	0.875	0.465728	0.9375	0.42425	1	0.483824	0.9375	0.417186	0.9375	0.407048	1	0.469684	0.9375	0.442266	1	0.400935	1	0.445019	0.9375	0.413766	1	1	2
11	0.500193	1	0.560824	0.75	0.52404	1	0.449716	0.9375	0.575304	0.875	0.464919	1	0.449557	1	0.543843	0.8125	0.445815	1	0.445419	1	0.52162	0.875	0.428367	0.9375	1	2
12	0.558319	1	0.569553	0.9375	0.49802	1	0.484023	0.9375	0.580763	0.9375	0.496161	1	0.51252	1	0.606533	1	0.503136	0.9375	0.461336	1	0.458932	1	0.440874	1	1	1
13	0.415935	0.9375	0.47786	0.8125	0.436994	1	0.38489	1	0.476251	0.9375	0.423967	0.9375	0.420061	1	0.494779	0.8125	0.396469	1	0.367477	1	0.438121	1	0.367167	1	1	2
14	0.543818	1	0.621409	0.9375	0.555943	1	0.499809	1	0.544041	1	0.511131	1	0.471375	1	0.540779	1	0.506127	1	0.468253	0.9375	0.542899	1	0.428051	1	1	1
15	0.4241	0.9375	0.523361	0.9375	0.457394	0.9375	0.425075	1	0.524701	0.8125	0.420597	1	0.435814	1	0.510681	0.875	0.459366	1	0.379254	1	0.490166	0.9375	0.430807	1	1	1
16	0.450947	0.8125	0.507914	0.9375	0.465456	1	0.423176	1	0.474774	0.875	0.415749	1	0.413703	0.9375	0.482959	0.875	0.430698	1	0.400598	0.875	0.470289	0.9375	0.425502	1	1	2
17	0.514659	1	0.59654	1	0.505321	0.9375	0.490381	1	0.589088	1	0.4891	1	0.479473	1	0.574239	0.875	0.552762	1	0.482813	1	0.554648	1	0.52889	1	1	1
18	0.519362	1	0.652123	0.9375	0.49259	1	0.536213	1	0.626049	0.9375	0.481128	1	0.480985	1	0.603474	1	0.545142	1	0.483979	1	0.572189	0.9375	0.44479	1	1	1
19	0.464171	0.875	0.509738	1	0.49088	0.9375	0.43165	1	0.512183	1	0.468641	1	0.436524	1	0.491899	0.875	0.382876	1	0.386632	1	0.48182	0.8125	0.409688	1	1	2
20	0.406056	0.9375	0.552881	0.875	0.458183	0.9375	0.421734	0.9375	0.495483	0.8125	0.406945	1	0.410045	0.9375	0.527727	0.875	0.442707	1	0.392822	1	0.481415	0.625	0.395476	0.8125	1	1
21	0.482933	1	0.566254	0.75	0.485046	1	0.437641	1	0.578077	0.8125	0.491244	1	0.450131	1	0.57108	0.9375	0.449653	1	0.409559	1	0.514449	0.9375	0.466097	0.9375	1	1
22	0.510645	1	0.553572	1	0.486636	1	0.465653	1	0.531896	0.9375	0.469295	1	0.476718	1	0.539101	0.875	0.486975	1	0.489346	1	0.49881	1	0.463588	1	1	1
23	0.437663	1	0.478666	1	0.416747	1	0.375797	1	0.482919	0.9375	0.396027	1	0.380025	1	0.463743	1	0.378863	1	0.378826	1	0.431603	1	0.375747	1	1	2
24	0.455185	1	0.543238	0.75	0.439382	1	0.428909	1	0.507095	0.9375	0.464577	1	0.455426	1	0.517495	0.9375	0.416943	1	0.422762	1	0.477996	1	0.420515	1	1	1
25	0.475018	1	0.576117	1	0.463059	0.9375	0.473613	1	0.559927	0.9375	0.474639	1	0.447748	0.9375	0.546629	0.875	0.450949	1	0.436257	1	0.465249	0.9375	0.437218	1	1	1
26	0.50465	0.9375	0.590153	0.875	0.489285	0.9375	0.477711	1	0.644281	0.9375	0.498135	0.9375	0.459233	1	0.622204	0.9375	0.477758	0.9375	0.494808	1	0.578286	0.875	0.462124	1	1	1
27	0.490627	0.875	0.539824	0.9375	0.489028	1	0.462903	1	0.528323	1	0.493228	1	0.468632	1	0.510607	1	0.461388	1	0.430088	1	0.462725	0.9375	0.421371	1	1	2
28	0.451673	1	0.490708	0.875	0.440126	0.9375	0.415944	1	0.457131	0.8125	0.425919	1	0.409139	1	0.452759	0.8125	0.416368	1	0.395367	1	0.451651	0.875	0.383248	1	1	2
29	0.417443	1	0.498317	0.6875	0.417308	0.9375	0.402793	1	0.510971	0.8125	0.39292	1	0.386595	1	0.451864	0.8125	0.375016	1	0.38361	1	0.443575	0.875	0.373058	1	1	2
30	0.444099	1	0.492373	0.875	0.453574	1	0.413385	1	0.521868	0.875	0.445533	1	0.428171	1	0.490699	0.9375	0.417721	1	0.417064	1	0.465147	0.875	0.40973	1	1	2
31	0.443319	1	0.506922	0.9375	0.465168	1	0.45227	1	0.489446	1	0.435965	1	0.463838	1	0.505947	0.6875	0.457134	1	0.423166	1	0.484786	0.9375	0.427586	1	1	1
32	0.432097	1	0.507934	0.8125	0.435689	0.9375	0.424597	1	0.49403	0.6875	0.426234	0.9375	0.42463	1	0.476982	0.9375	0.442725	1	0.431342	1	0.497456	0.875	0.415305	1	1	1
33	0.472081	1	0.556913	0.875	0.49609	0.9375	0.454913	1	0.537595	0.9375	0.46749	1	0.480113	0.9375	0.562585	1	0.474169	1	0.460912	1	0.544887	1	0.478285	1	1	1
34	0.436837	1	0.524249	0.875	0.463254	0.9375	0.42845	1	0.53948	0.75	0.431741	1	0.428515	0.9375	0.50186	0.8125	0.440706	1	0.413356	1	0.51893	1	0.416523	1	1	2
35	0.507184	1	0.579546	1	0.497477	1	0.494039	0.9375	0.595811	0.875	0.472675	1	0.454003	1	0.578088	0.875	0.468318	1	0.447648	1	0.560978	1	0.465329	1	1	2
36	0.496974	1	0.556432	0.875	0.478443	0.875	0.457265	1	0.564236	1	0.462941	1	0.507517	1	0.533998	0.9375	0.50835	0.9375	0.45228	1	0.541366	1	0.471453	1	1	2
37	0.456332	0.9375	0.508763	0.9375	0.431932	0.9375	0.42944	1	0.521068	1	0.420061	1	0.407629	1	0.531253	1	0.439062	1	0.398316	1	0.497569	1	0.407002	1	2	1
38	0.548977	1	0.636867	0.875	0.510575	1	0.476264	1	0.620352	0.875	0.492668	0.9375	0.436616	1	0.574642	0.8125	0.515148	1	0.444118	1	0.576538	0.9375	0.461371	1	2	1
39	0.422365	0.9375	0.514663	0.9375	0.443092	1	0.429908	1	0.502495	0.875	0.430513	0.9375	0.432991	1	0.497374	1	0.430565	1	0.42574	1	0.502203	1	0.437773	0.9375	2	2
40	0.501329	1	0.539558	1	0.48218	1	0.454916	1	0.543306	0.9375	0.448344	1	0.489625	1	0.569587	0.875	0.467133	1	0.498687	0.9375	0.52413	0.9375	0.440708	1	2	1
41	0.49782	1	0.520624	0.875	0.495785	0.9375	0.50054	1	0.55148	0.9375	0.499932	0.9375	0.463891	1	0.565073	0.9375	0.443868	1	0.423337	0.9375	0.485261	1	0.46154	0.9375	2	1
42	0.591994	1	0.621627	1	0.568821	1	0.572579	1	0.643065	1	0.543792	1	0.576459	1	0.61811	1	0.550773	1	0.566761	1	0.588592	0.9375	0.536901	1	2	2
43	0.473778	0.9375	0.50932	0.875	0.478963	1	0.48165	1	0.527723	0.9375	0.469481	1	0.455488	1	0.534833	0.9375	0.463768	1	0.440256	1	0.525315	0.875	0.469721	1	2	1
44	0.4358	1	0.511059	1	0.436209	0.9375	0.409665	1	0.497984	0.9375	0.421941	1	0.426374	1	0.486274	1	0.437913	0.9375	0.401196	0.9375	0.470715	1	0.389391	1	2	2
45	0.49518	1	0.528494	0.875	0.462041	1	0.40811	1	0.536825	0.875	0.424406	1	0.466877	1	0.483969	0.875	0.421541	1	0.426418	1	0.477109	1	0.393565	0.9375	2	1
46	0.456458	1	0.563129	1	0.474617	1	0.428333	1	0.546587	1	0.454389	0.9375	0.473152	1	0.515896	0.9375	0.454215	1	0.417856	1	0.486588	1	0.448901	1	2	2
47	0.431939	1	0.520722	0.9375	0.449637	0.9375	0.416393	1	0.490934	0.875	0.410344	0.9375	0.404331	1	0.502998	0.8125	0.383608	1	0.408749	1	0.468948	0.875	0.407087	1	2	2
48	0.449719	1	0.498736	1	0.43137	0.875	0.406483	0.9375	0.478616	1	0.421321	1	0.417614	1	0.464653	0.9375	0.436809	1	0.390852	1	0.402899	0.9375	0.392169	0.9375	2	1
49	0.49026	1	0.535355	0.9375	0.510379	1	0.477759	1	0.561839	1	0.480435	0.9375	0.477659	0.9375	0.539786	0.9375	0.485792	0.9375	0.454246	1	0.506395	1	0.435419	1	2	1
50	0.463727	0.9375	0.52711	0.8125	0.456128	1	0.427828	1	0.491695	0.9375	0.427208	1	0.428818	1	0.480327	0.875	0.434928	1	0.389864	1	0.450931	0.8125	0.40449	1	2	1
51	0.436171	0.875	0.458363	0.9375	0.419851	1	0.405607	1	0.47477	1	0.400244	1	0.380089	1	0.466302	1	0.377665	1	0.378778	1	0.460754	0.9375	0.394463	1	2	2
52	0.473303	1	0.54225	0.875	0.453876	1	0.431341	1	0.549239	1	0.456199	1	0.434953	1	0.49352	0.9375	0.44942	1	0.415075	1	0.470261	0.9375	0.409017	1	2	2
53	0.492275	1	0.549671	0.875	0.488431	1	0.465366	1	0.541791	0.8125	0.451021	1	0.428113	1	0.554435	0.9375	0.4257	1	0.439602	1	0.52657	1	0.44504	1	2	1
54	0.606944	0.875	0.61739	0.875	0.59473	0.9375	0.585262	1	0.596367	0.875	0.521929	0.875	0.530416	1	0.547659	0.9375	0.501965	1	0.526472	1	0.553681	0.9375	0.568882	1	2	1
55	0.3795	1	0.427651	0.5	0.38865	0.9375	0.357991	1	0.482977	0.5	0.399503	0.9375	0.346049	1	0.435347	0.625	0.37962	0.8125	0.33874	1	0.387363	0.75	0.357201	0.9375	2	2
56	0.491685	1	0.486959	0.9375	0.498791	0.9375	0.434978	1	0.490614	0.9375	0.465605	1	0.468139	0.9375	0.500285	0.875	0.464337	0.875	0.421321	1	0.477743	1	0.399393	0.9375	2	1
57	0.413388	1	0.49329	0.875	0.433616	1	0.397691	1	0.507373	0.9375	0.439874	1	0.404857	1	0.493804	0.9375	0.414253	1	0.400667	1	0.464121	0.9375	0.394784	1	2	2
58	0.507094	1	0.588432	0.875	0.506664	1	0.49068	1	0.581181	1	0.498728	1	0.51964	1	0.617201	0.875	0.526107	1	0.50223	0.9375	0.555841	0.9375	0.481912	1	2	2
59	0.448494	1	0.507311	0.9375	0.43505	1	0.431067	1	0.527919	0.9375	0.401598	1	0.444265	0.9375	0.481339	0.9375	0.417438	1	0.412457	1	0.464258	1	0.382582	1	2	1
60	0.39159	1	0.449475	0.625	0.380284	0.9375	0.384183	1	0.474545	0.9375	0.387768	1	0.389472	0.9375	0.486894	0.8125	0.379983	1	0.369211	1	0.474247	0.9375	0.38939	1	2	1
61	0.440933	1	0.526013	1	0.453512	1	0.417535	1	0.518725	0.875	0.412103	1	0.404049	1	0.503995	1	0.440287	1	0.415524	1	0.47801	0.9375	0.42095	1	2	2
62	0.511694	1	0.565695	0.875	0.496149	1	0.493444	1	0.544827	1	0.490674	1	0.49469	1	0.545715	0.9375	0.530317	1	0.436114	1	0.467142	1	0.445961	1	2	1
63	0.460553	1	0.505	1	0.477965	1	0.452013	1	0.506076	0.9375	0.415375	1	0.433996	1	0.471052	0.9375	0.437535	0.9375	0.419589	1	0.448245	1	0.410683	1	2	2
64	0.478168	1	0.516028	0.9375	0.472147	1	0.441743	1	0.51647	0.9375	0.440798	1	0.415757	1	0.509614	1	0.415952	0.9375	0.436546	1	0.478781	0.9375	0.41208	1	2	2
65	0.499287	1	0.539347	0.9375	0.461551	0.9375	0.435191	1	0.569401	0.875	0.453086	1	0.454943	1	0.553885	0.9375	0.461264	1	0.423021	0.9375	0.546238	0.9375	0.419972	1	2	1
66	0.501278	1	0.564552	0.9375	0.519658	1	0.48335	1	0.546473	0.9375	0.480591	1	0.464463	0.9375	0.56223	0.9375	0.457001	1	0.426053	1	0.501684	0.9375	0.430505	1	2	2
67	0.448388	0.9375	0.528788	0.9375	0.409284	1	0.41842	1	0.523147	0.9375	0.41674	1	0.402133	1	0.499409	0.875	0.416113	1	0.396377	1	0.492164	1	0.379637	1	2	2
68	0.425563	1	0.506635	0.8125	0.423905	1	0.402781	1	0.486487	0.6875	0.446346	1	0.406829	1	0.454307	0.6875	0.399941	1	0.381972	1	0.448819	0.9375	0.376301	1	2	2
69	0.464682	1	0.508638	0.9375	0.462971	1	0.428324	0.9375	0.476563	0.875	0.440718	0.9375	0.42602	1	0.485269	0.9375	0.424846	0.9375	0.407001	1	0.434533	1	0.404133	1	2	2
70	0.433142	1	0.479844	0.9375	0.45188	1	0.405459	1	0.507743	0.875	0.415348	1	0.415537	1	0.490338	1	0.420109	1	0.403937	1	0.481054	1	0.428228	1	2	1
71	0.56713	0.8125	0.616074	0.875	0.534952	0.8125	0.530594	1	0.631025	1	0.519361	1	0.545047	1	0.611049	0.8125	0.507374	1	0.579766	1	0.566061	0.875	0.559239	0.9375	2	1
72	0.447413	1	0.543795	0.8125	0.47546	0.9375	0.451535	1	0.507334	0.875	0.455401	0.9375	0.402747	1	0.507588	0.6875	0.443766	1	0.430749	0.9375	0.481798	0.875	0.444596	1	2	1

## Sheet: post-intervention(RTs and Acc)
	no cue						central cue						double cue						spatial cue
	Congruent		Incongruent		Neutral		Congruent		Incongruent		Neutral		Congruent		Incongruent		Neutral		Congruent		Incongruent		Neutral		group（1 = control group; 2 = MAVG group)	gender(1=male;2=female)
	RT(s)	accuracy	RT(s)	accuracy	RT(s)	accuracy	RT(s)	accuracy	RT(s)	accuracy	RT(s)	accuracy	RT(s)	accuracy	RT(s)	accuracy	RT(s)	accuracy	RT(s)	accuracy	RT(s)	accuracy	RT(s)	accuracy
1	0.394488	0.9375	0.455969	0.8125	0.396014	1	0.40403	0.875	0.450959	0.875	0.398722	1	0.37984	1	0.45566	0.875	0.37363	0.9375	0.381057	1	0.393972	0.9375	0.383224	1	1	1
2	0.491453	0.875	0.561158	1	0.522286	0.9375	0.514169	0.9375	0.554772	0.9375	0.502205	1	0.49234	1	0.549964	0.9375	0.451934	0.9375	0.445029	1	0.534242	0.9375	0.472784	1	1	2
3	0.551306	1	0.631004	1	0.546994	1	0.558858	1	0.642355	0.875	0.542848	1	0.501972	1	0.602181	0.9375	0.506853	0.9375	0.517752	1	0.635654	1	0.582412	1	1	2
4	0.497289	0.9375	0.555862	1	0.506606	1	0.462394	1	0.539057	1	0.480627	1	0.498178	1	0.595276	1	0.499823	1	0.462871	0.9375	0.490733	0.9375	0.460561	1	1	2
5	0.445246	1	0.470887	0.75	0.434684	0.9375	0.425447	0.9375	0.465239	0.75	0.426385	1	0.415201	1	0.465314	0.8125	0.409103	0.875	0.394451	1	0.466969	0.8125	0.382254	1	1	2
6	0.475641	1	0.537165	1	0.497785	1	0.453614	1	0.555615	0.9375	0.456151	1	0.451602	1	0.51203	1	0.462807	1	0.423854	1	0.495719	1	0.429699	1	1	1
7	0.458261	1	0.492776	0.8125	0.4456	0.9375	0.429558	1	0.499916	0.875	0.416252	0.9375	0.418518	1	0.468201	0.9375	0.419731	1	0.405274	1	0.450286	1	0.397954	1	1	1
8	0.478794	1	0.536987	0.6875	0.452904	0.9375	0.454986	1	0.487878	0.9375	0.463166	1	0.406825	1	0.506469	0.6875	0.4043	0.9375	0.440393	1	0.482919	0.8125	0.458727	1	1	2
9	0.467631	1	0.531854	0.875	0.441286	1	0.459565	1	0.475816	1	0.445701	1	0.443681	1	0.498193	1	0.467737	1	0.428475	1	0.514264	0.9375	0.427068	1	1	1
10	0.474346	0.9375	0.555032	0.9375	0.457943	1	0.439429	1	0.540464	0.9375	0.47841	1	0.444592	1	0.531935	0.875	0.431472	1	0.428255	1	0.500589	1	0.447411	1	1	2
11	0.462595	1	0.530273	0.8125	0.420884	1	0.396601	1	0.493214	0.9375	0.427343	1	0.413898	1	0.499516	1	0.415921	1	0.397909	1	0.463507	1	0.387862	1	1	2
12	0.457055	1	0.565405	1	0.471586	1	0.471907	1	0.54425	0.9375	0.453164	1	0.446226	1	0.526684	0.9375	0.488435	1	0.445877	1	0.524909	0.875	0.450748	1	1	1
13	0.471119	1	0.541734	0.9375	0.437822	1	0.418641	1	0.542076	0.9375	0.420945	1	0.417961	0.9375	0.500689	1	0.429952	1	0.420152	1	0.505358	0.875	0.389477	1	1	2
14	0.502696	1	0.549833	1	0.508569	0.875	0.485498	1	0.548007	0.9375	0.483957	1	0.497735	0.9375	0.540755	0.9375	0.486189	1	0.45388	1	0.541193	1	0.476911	1	1	1
15	0.48747	1	0.5463	1	0.510501	0.9375	0.479673	1	0.518912	1	0.455037	1	0.472672	1	0.489405	0.9375	0.476416	1	0.461245	1	0.541235	1	0.434035	0.9375	1	1
16	0.488051	1	0.539812	0.9375	0.510247	1	0.465803	1	0.542053	0.875	0.463466	0.9375	0.467525	1	0.517923	1	0.511083	1	0.426154	1	0.470894	1	0.451271	1	1	2
17	0.479544	1	0.61647	0.9375	0.526205	1	0.460191	1	0.582403	0.875	0.498784	1	0.461911	1	0.565637	0.9375	0.479823	1	0.462165	0.9375	0.520475	0.9375	0.483773	0.9375	1	1
18	0.447811	1	0.535907	1	0.41241	1	0.420884	1	0.542974	0.875	0.446041	1	0.405548	1	0.532243	0.8125	0.448717	1	0.392543	1	0.485563	0.875	0.382613	1	1	1
19	0.493645	0.9375	0.562998	1	0.512402	1	0.502587	1	0.537683	0.9375	0.484733	1	0.457584	1	0.528111	0.875	0.470791	1	0.435913	1	0.473128	1	0.44655	1	1	2
20	0.425744	0.9375	0.489486	0.8125	0.448742	0.9375	0.378813	0.9375	0.467468	0.75	0.390979	1	0.397456	1	0.458248	0.875	0.411602	1	0.378161	1	0.43087	0.75	0.36024	0.875	1	1
21	0.443391	0.9375	0.537293	0.9375	0.445477	0.9375	0.452087	1	0.479814	0.875	0.45325	1	0.453192	0.9375	0.511457	0.875	0.415041	1	0.427192	0.8125	0.466308	0.9375	0.42425	1	1	1
22	0.440014	1	0.481878	1	0.447673	1	0.421604	1	0.453122	0.875	0.431003	1	0.424566	0.9375	0.454302	0.8125	0.423248	0.875	0.407974	1	0.447873	1	0.418565	0.9375	1	1
23	0.453999	1	0.479905	0.875	0.438085	1	0.406086	1	0.507244	1	0.429695	1	0.406676	1	0.497681	0.9375	0.421518	1	0.410849	1	0.475416	1	0.41359	1	1	2
24	0.434478	0.9375	0.515001	0.6875	0.434304	0.9375	0.415769	1	0.511728	0.9375	0.422111	1	0.389483	1	0.458151	0.5	0.395113	0.9375	0.413172	1	0.484959	0.9375	0.416544	1	1	1
25	0.490933	1	0.565616	1	0.469118	1	0.462577	1	0.535495	1	0.493114	0.9375	0.526489	1	0.564858	0.875	0.449847	1	0.447864	1	0.489595	0.9375	0.447927	1	1	1
26	0.440664	1	0.504529	0.875	0.462506	1	0.444821	1	0.497425	0.9375	0.457804	1	0.444787	1	0.505204	1	0.446756	1	0.434767	1	0.468838	0.9375	0.424339	1	1	1
27	0.425581	1	0.498752	0.9375	0.456567	1	0.393068	1	0.498661	0.8125	0.404025	1	0.414222	1	0.494479	0.875	0.407578	0.9375	0.391832	1	0.487052	0.8125	0.409368	1	1	2
28	0.473786	1	0.533956	0.8125	0.463619	0.9375	0.432079	1	0.505102	1	0.435759	1	0.452591	1	0.504624	0.9375	0.429148	1	0.426629	1	0.487335	0.9375	0.423929	1	1	2
29	0.505715	0.9375	0.534002	0.875	0.489027	1	0.470823	1	0.514921	1	0.477856	1	0.471505	1	0.529339	0.9375	0.507715	1	0.447615	1	0.46547	1	0.421695	1	1	2
30	0.460835	1	0.517646	0.9375	0.471086	0.875	0.434755	1	0.505242	1	0.415997	1	0.439353	1	0.502691	0.875	0.442102	1	0.434124	1	0.501525	1	0.440723	1	1	2
31	0.420822	1	0.478773	0.875	0.427674	1	0.41317	1	0.461475	0.75	0.400973	1	0.403454	1	0.474014	0.9375	0.409041	1	0.412633	1	0.446795	1	0.39068	1	1	1
32	0.435712	1	0.534857	0.9375	0.442923	0.9375	0.441262	1	0.551895	1	0.425725	1	0.418649	1	0.512916	0.9375	0.426576	1	0.398929	1	0.476028	1	0.43194	1	1	1
33	0.459225	1	0.529771	1	0.447099	1	0.446562	0.9375	0.511366	0.875	0.434962	1	0.429683	1	0.519632	1	0.444843	1	0.410491	1	0.476067	1	0.42469	1	1	1
34	0.451193	1	0.518782	0.875	0.443364	1	0.415753	1	0.487222	0.9375	0.387685	1	0.413067	0.9375	0.462942	0.75	0.396406	1	0.403219	1	0.460985	0.875	0.390904	1	1	2
35	0.398229	0.875	0.45301	0.9375	0.423619	0.9375	0.420019	1	0.44735	0.9375	0.394942	1	0.382984	1	0.46483	0.9375	0.44202	1	0.390336	1	0.405592	1	0.373472	1	1	2
36	0.489294	1	0.541407	1	0.473291	1	0.475447	1	0.539796	0.9375	0.464722	1	0.481748	1	0.51351	1	0.471423	0.9375	0.421274	1	0.466555	0.875	0.43582	0.9375	1	2
37	0.453693	1	0.525545	0.8125	0.448536	0.9375	0.37749	1	0.446214	0.9375	0.40992	1	0.41657	0.9375	0.488387	0.9375	0.412816	1	0.393585	0.9375	0.453184	0.9375	0.389007	1	2	1
38	0.403001	1	0.432615	0.9375	0.405291	1	0.375729	1	0.417614	0.875	0.403896	0.9375	0.364938	1	0.416447	0.8125	0.386868	1	0.355027	1	0.432883	0.875	0.358398	0.9375	2	1
39	0.531623	1	0.62808	0.8125	0.53725	0.9375	0.517368	1	0.568551	0.8125	0.513593	1	0.483379	1	0.60226	0.8125	0.494448	1	0.493177	1	0.569918	0.9375	0.49976	0.9375	2	2
40	0.454274	0.875	0.608882	0.875	0.490069	1	0.427414	1	0.557629	1	0.49186	1	0.457156	1	0.537581	0.9375	0.466545	1	0.41599	0.9375	0.505024	1	0.436963	1	2	1
41	0.594227	1	0.605671	0.75	0.615164	1	0.550662	1	0.604943	1	0.60385	1	0.521406	1	0.522465	1	0.495713	0.9375	0.510778	1	0.561316	1	0.509996	1	2	1
42	0.395122	1	0.459095	0.625	0.390864	0.9375	0.379736	0.9375	0.44215	0.5625	0.373982	0.9375	0.368025	0.75	0.370221	0.625	0.352255	1	0.342288	0.8125	0.384128	0.8125	0.342691	0.9375	2	2
43	0.525299	1	0.592035	0.875	0.520197	0.875	0.479666	1	0.49547	0.8125	0.490546	0.875	0.485289	1	0.497703	1	0.454925	1	0.434138	0.9375	0.459736	0.875	0.439297	0.9375	2	1
44	0.438756	1	0.496892	0.9375	0.408078	1	0.416968	1	0.493207	0.9375	0.426912	1	0.422476	1	0.469688	0.9375	0.420534	1	0.414435	1	0.463067	1	0.385383	0.9375	2	2
45	0.49827	1	0.551875	1	0.502698	0.9375	0.445646	1	0.550341	1	0.449323	1	0.450385	1	0.536462	1	0.459423	1	0.474996	1	0.462419	1	0.440678	1	2	1
46	0.426593	0.9375	0.461247	0.8125	0.395922	0.9375	0.393181	1	0.43491	0.9375	0.393907	1	0.369621	0.9375	0.445733	1	0.370787	1	0.361405	0.9375	0.400488	0.875	0.355875	1	2	2
47	0.413452	0.9375	0.476607	0.8125	0.427743	1	0.378229	1	0.467035	0.6875	0.390208	0.9375	0.381807	1	0.456929	0.75	0.395163	0.9375	0.376521	1	0.438017	0.875	0.370059	1	2	2
48	0.416991	1	0.50052	0.9375	0.454407	0.9375	0.40596	1	0.489705	1	0.408757	1	0.404986	1	0.486135	1	0.402497	0.9375	0.415119	1	0.480713	1	0.407453	1	2	1
49	0.514559	1	0.57567	1	0.515196	1	0.49379	0.9375	0.574337	1	0.478823	1	0.474915	1	0.554954	1	0.472018	1	0.446699	1	0.508287	1	0.439431	1	2	1
50	0.442307	0.9375	0.508204	0.9375	0.46198	1	0.436091	1	0.510687	1	0.43008	1	0.432424	1	0.479664	1	0.40618	1	0.406624	1	0.42282	0.9375	0.406098	1	2	1
51	0.461158	1	0.472698	0.9375	0.44187	0.9375	0.432091	0.9375	0.459049	0.9375	0.430927	1	0.412981	1	0.485808	0.9375	0.411136	1	0.41191	1	0.470251	0.9375	0.387039	1	2	2
52	0.518816	0.875	0.433389	0.5625	0.441381	0.8125	0.434262	0.6875	0.515193	0.8125	0.452866	0.9375	0.391778	0.9375	0.493756	0.75	0.364852	0.8125	0.391339	0.875	0.416011	0.8125	0.463957	0.875	2	2
53	0.496575	1	0.560793	1	0.482881	1	0.474986	1	0.529412	0.8125	0.447732	1	0.456997	0.9375	0.561235	1	0.439264	1	0.434283	1	0.474426	0.9375	0.414465	1	2	1
54	0.444388	1	0.488459	1	0.436216	0.9375	0.385274	1	0.470534	0.875	0.393855	1	0.38819	1	0.479861	0.9375	0.407164	1	0.378843	1	0.438771	0.9375	0.382563	1	2	1
55	0.367883	1	0.428775	0.9375	0.399987	1	0.378082	1	0.440915	0.8125	0.382569	1	0.356197	1	0.429535	0.5625	0.373071	1	0.364751	1	0.391652	0.75	0.362577	1	2	2
56	0.451798	1	0.489758	0.9375	0.45856	1	0.435279	1	0.495081	0.875	0.403567	0.9375	0.405088	1	0.483222	0.875	0.44108	0.9375	0.413011	1	0.438694	0.9375	0.396638	1	2	1
57	0.460502	1	0.478549	1	0.423173	1	0.418052	1	0.452984	0.875	0.390893	1	0.385169	1	0.4536	0.8125	0.396738	0.9375	0.388468	1	0.428667	0.9375	0.388204	1	2	2
58	0.48478	0.9375	0.587223	0.9375	0.451974	1	0.501143	1	0.647019	0.8125	0.459602	1	0.476046	0.9375	0.617115	1	0.48719	1	0.469678	1	0.561142	1	0.46208	1	2	2
59	0.448561	0.9375	0.511391	0.8125	0.464909	1	0.424416	0.875	0.52977	0.9375	0.429356	0.875	0.441481	1	0.493917	0.8125	0.438273	0.9375	0.404856	1	0.478032	0.875	0.430909	0.875	2	1
60	0.416899	1	0.449626	0.875	0.434875	1	0.377527	1	0.443197	0.875	0.404999	0.8125	0.4082	0.9375	0.435059	0.875	0.38596	0.9375	0.390385	1	0.437807	0.75	0.394835	1	2	1
61	0.516886	1	0.601082	0.9375	0.528007	0.9375	0.531459	0.9375	0.539439	1	0.464313	1	0.491607	1	0.569075	0.9375	0.456986	1	0.429302	0.875	0.494249	1	0.518409	0.9375	2	2
62	0.607619	1	0.618554	0.9375	0.541024	1	0.556939	1	0.600003	1	0.551948	1	0.480463	1	0.607971	0.9375	0.505269	1	0.50626	1	0.549861	1	0.48946	0.9375	2	1
63	0.525475	0.9375	0.564033	0.9375	0.527202	0.875	0.472555	1	0.527525	1	0.47158	1	0.483939	1	0.504987	1	0.481008	1	0.476515	0.9375	0.499342	1	0.507864	1	2	2
64	0.447243	1	0.492747	1	0.4522	1	0.40332	1	0.505518	0.625	0.415429	0.9375	0.411229	1	0.497494	0.6875	0.408763	0.9375	0.416004	0.9375	0.495949	0.875	0.429689	1	2	2
65	0.455917	1	0.491599	0.875	0.424947	1	0.432221	0.875	0.506112	0.9375	0.437324	0.9375	0.412228	1	0.466516	0.9375	0.40363	1	0.37654	0.9375	0.492231	0.875	0.359688	1	2	1
66	0.404559	1	0.460341	0.9375	0.432915	1	0.427546	1	0.448439	0.75	0.406465	1	0.414185	1	0.458142	0.8125	0.414291	1	0.406265	0.9375	0.422748	0.9375	0.388695	1	2	2
67	0.483939	1	0.551077	0.9375	0.517937	1	0.466414	1	0.552344	0.8125	0.468354	1	0.404279	1	0.519895	0.9375	0.456352	1	0.436775	0.9375	0.462975	0.8125	0.408556	1	2	2
68	0.43863	0.9375	0.496285	1	0.45146	1	0.428898	1	0.497276	0.9375	0.420638	1	0.440344	1	0.474859	0.8125	0.413209	0.9375	0.407296	1	0.456271	1	0.408236	1	2	2
69	0.467123	1	0.530724	1	0.449273	1	0.427792	1	0.522185	0.9375	0.450208	0.9375	0.433358	1	0.50119	0.875	0.428917	0.9375	0.426823	1	0.475418	0.9375	0.4119	1	2	2
70	0.432307	1	0.506624	0.875	0.457897	1	0.420462	1	0.494534	0.75	0.402583	1	0.411033	1	0.464812	1	0.396073	1	0.378961	1	0.43161	1	0.365759	1	2	1
71	0.473667	1	0.588414	0.75	0.517525	1	0.482891	1	0.561805	0.9375	0.47508	1	0.466549	1	0.519889	1	0.477469	1	0.426824	0.9375	0.537676	0.9375	0.446152	1	2	1
72	0.42117	0.9375	0.508375	0.9375	0.428128	1	0.389849	1	0.472012	1	0.408582	0.9375	0.392856	1	0.458496	0.875	0.399815	1	0.385288	1	0.406835	0.9375	0.376193	1	2	1
