# Supplementary material for: Effects of a single bout of mobile action video game play on attentional networks
Source: PeerJ. 2023 Nov 10;11:e16409. doi: 10.7717/peerj.16409 (PMC10642364; doi:10.7717/peerj.16409)
Supplement: Supplemental Information 2 [file peerj-11-16409-s002.xlsx]

## Sheet: Sheet1
Participants	You play video games frequently (1=Strongly Disagree 7=Strongly Agree)	Video games played more often	Years of playing these two video games	Hours of video game play per week in the past 6 months
1	1	——	——	0min
2	1	——	——	0min
3	1	——	——	0min
4	1	Mahjong, Happy Poker（puzzle game)	3 months	0-60min
5	1	——	——	0min
6	1	——	——	0min
7	1	——	——	0min
8	2	Happy Poker（puzzle game)	1 year	0-60min
9	1	——	——	0min
10	1	——	——	0min
11	1	——	——	0min
12	1	——	——	0min
13	1	——	——	0min
14	1	Superstar Growth Program （Simulation Game）	6 months	0-30min
15	1	——	——	0min
16	1	——	——	0min
17	1	——	——	0min
18	1	——	——	0min
19	2	Web mini games (unlimited variety)	5 years	0-10min
20	1	——	——	0min
21	1	——	——	0min
22	1	——	——	0min
23	1	——	——	0min
24	1	Happy Poker（puzzle game)	2 years	0-30min
25	1	——	——	0min
26	1	The Hundred Scenes of Jiangnan （Management game）		0-15min
27	1	——	——	0min
28	1	Happy Poker （puzzle game)	2 months	0-30min
29	1	——	——	0min
30	1	——	——	0min
31	1	——	——	0min
32	1	——	——	0min
33	1	——	——	0min
34	1	——	——	0min
35	2	The Hundred Scenes of Jiangnan （Management game）	1 month	0-60min
36	1	——	——	0min
37	1	——	——	0min
38	1	——	——	0min
39	1	——	——	0min
40	1	——	——	0min
41	2	Anipop（puzzle game)	2 years	0-30min
42	1	Superstar Growth Program （Simulation Game）	6 month	0-30min
43	2	Mahjong, Happy Poker （puzzle game)	6 months	0-60min
44	1	——	——	0min
45	1	——	——	0min
46	1	——	——	0min
47	1	——	——	0min
48	1	——	——	0min
49	1	——	——	0min
50	1	——	——	0min
51	1	——	——	0min
52	1	——	——	0min
53	1	Anipop（puzzle game)	2 years	0-30min
54	1	——	——	0min
55	1	——	——	0min
56	1	——	——	0min
57	1	Mahjong（puzzle game)	6 months	0-60min
58	1	——	——	0min
59	1	——	——	0min
60	1	——	——	0min
61	1	——	——	0min
62	1	——	——	0min
63	1	——	——	0min
64	2	The Hundred Scenes of Jiangnan （Management game）	2 months	0-60min
65	1	——	——	0min
66	1	——	——	0min
67	1	——	——	0min
68	2	The Hundred Scenes of Jiangnan （Management game）	2 years	0-60min
69	1	——	——	0min
70	1	——	——	0min
71	1	——	——	0min
72	1	——	——	0min
